# Supplementary material for: The ability of locked nucleic acid oligonucleotides to pre-structure the double helix: A molecular simulation and binding study
Source: PubMed Central journal article supplement (PMC6372149; doi:10.1371/journal.pone.0211651), 2019-02-12
Supplement: pone.0211651.s001.pdf [file pone.0211651.s001.pdf]

**Table S1.** The average base pair parameters of eight duplexes, counted from 500 ns simulations for each system.

|         | x-displacement (Å) | Slide (Å) | Twist (°) |
|---------|--------------------|-----------|-----------|
| dupDNA  | -0.77              | 0.1       | 33.9      |
| dup1D1L | -4.47              | -1.77     | 28.6      |
| dup2D1L | -2.77              | -0.96     | 31.2      |
| dup3D1L | -2.20              | -0.71     | 32.1      |
| dup2D2L | -3.53              | -1.33     | 29.4      |
| dup2L2D | -3.45              | -1.34     | 29.5      |
| dupD5LD | -2.58              | -0.9      | 30.9      |
| dupLNA  | -5.58              | -2.18     | 26        |
