# Supplementary material for: The ability of locked nucleic acid oligonucleotides to pre-structure the double helix: A molecular simulation and binding study
Source: PubMed Central journal article supplement (PMC6372149; doi:10.1371/journal.pone.0211651), 2019-02-12
Supplement: pone.0211651.s004.pdf [file pone.0211651.s004.pdf]

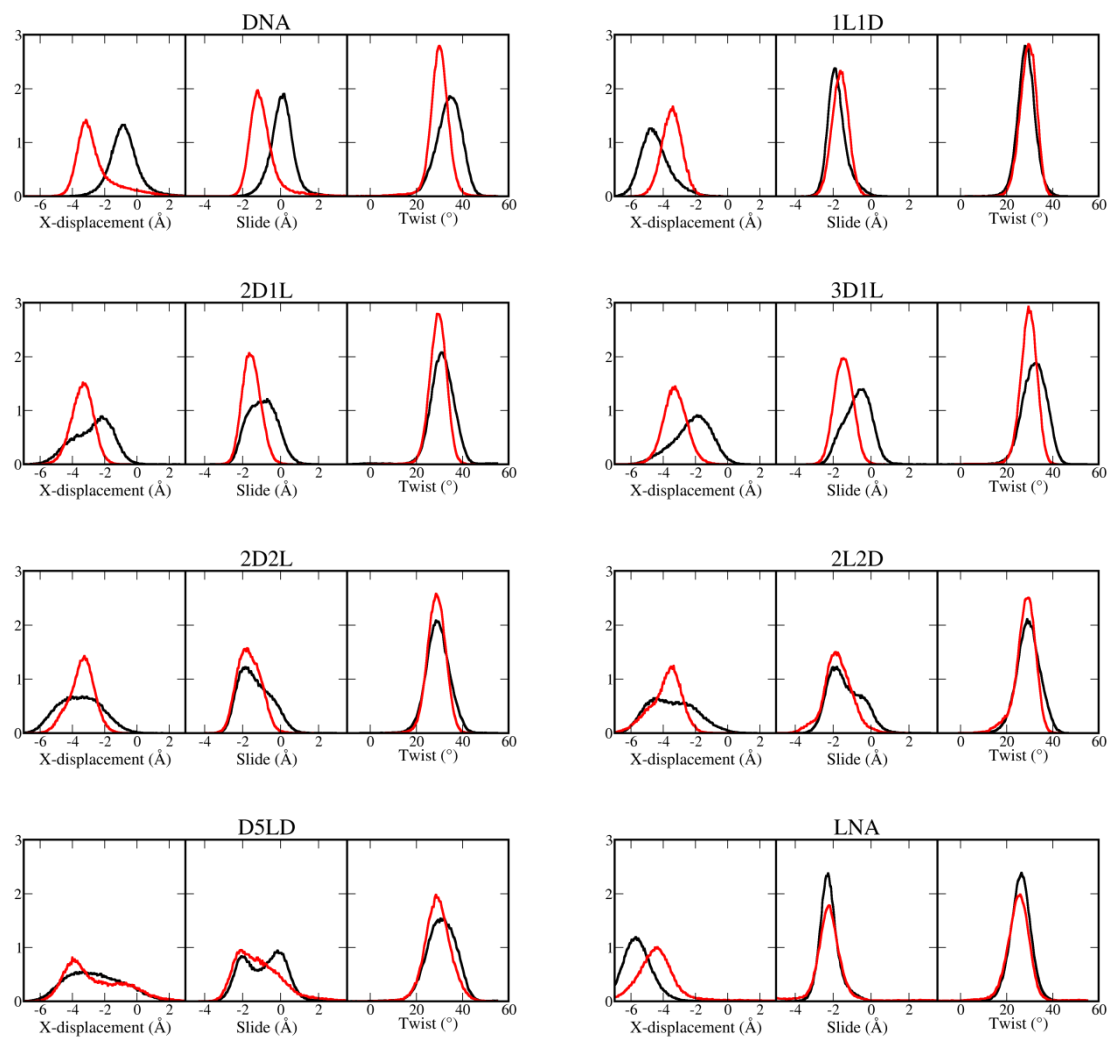

**Fig S3.** The selected base pair geometries (x-displacement, slide and twist) of each duplex and corresponding triplex. The histograms were sampled from 500 ns simulations. The triplex conformations are shown in red and duplexes are in black.
