# Supplementary material for: The ability of locked nucleic acid oligonucleotides to pre-structure the double helix: A molecular simulation and binding study
Source: PubMed Central journal article supplement (PMC6372149; doi:10.1371/journal.pone.0211651), 2019-02-12
Supplement: pone.0211651.s005.pdf [file pone.0211651.s005.pdf]

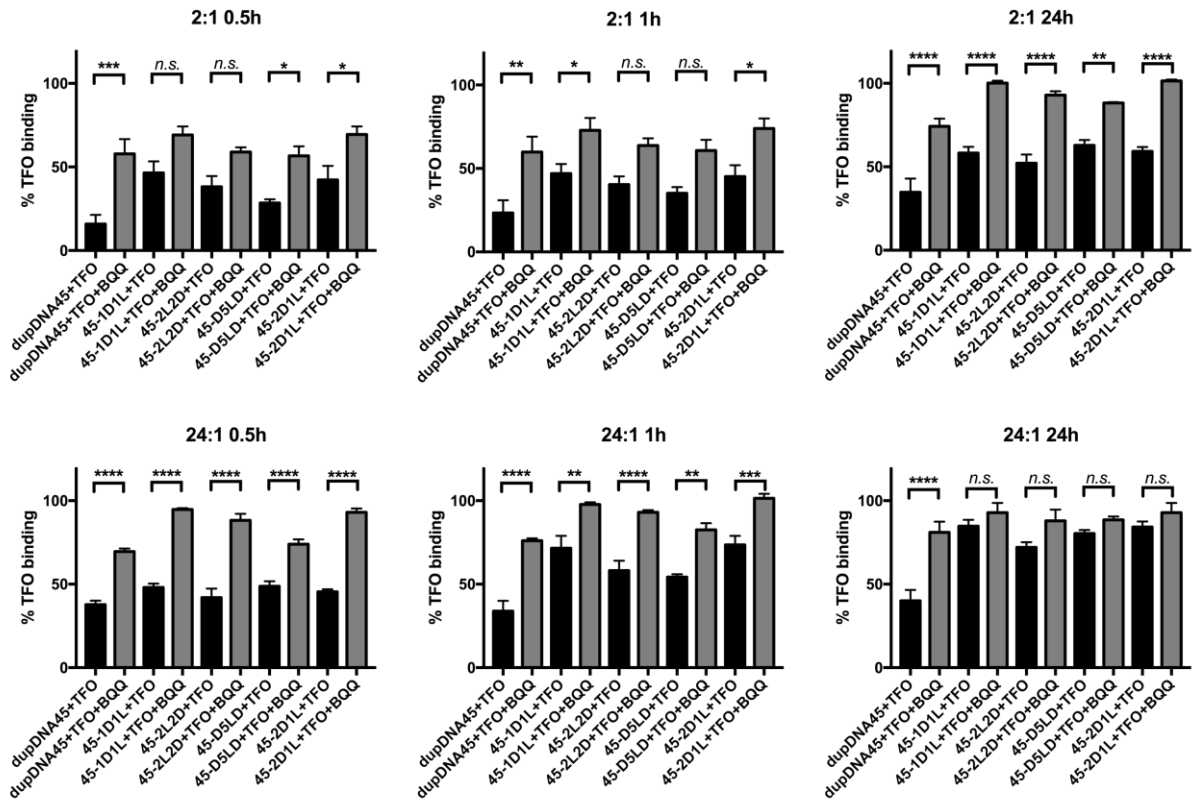

**Fig S4. The effect of BQQ on triplex formation.** Graphs show the percentage of TFO binding at 0.5, 1 and 24 h respectively at the two ratios studied (2:1 and 24:1 TFO:duplex). For duplex names, see Table 2 and Fig. 4. Significant differences between triplexes formed with or without BQQ are marked with stars (\*\*\*\*  $p < 0.0001$ , \*\*\*  $p < 0.001$ , \*\*  $p < 0.01$ , \*  $p < 0.05$ ); nonsignificant differences are marked with n.s. Statistical analysis was performed using GraphPad prism (v6) and one-way ANOVA to determine significance. Error bars show the mean+SEM,  $n=4$  for all samples and time points, except for the 45-D5LD samples where  $n=3$ .
