# Supplementary material for: The ability of locked nucleic acid oligonucleotides to pre-structure the double helix: A molecular simulation and binding study
Source: PubMed Central journal article supplement (PMC6372149; doi:10.1371/journal.pone.0211651), 2019-02-12
Supplement: pone.0211651.s006.pdf [file pone.0211651.s006.pdf]

**2:1 ratio TFO:heteroduplex**  
**0.5 h**

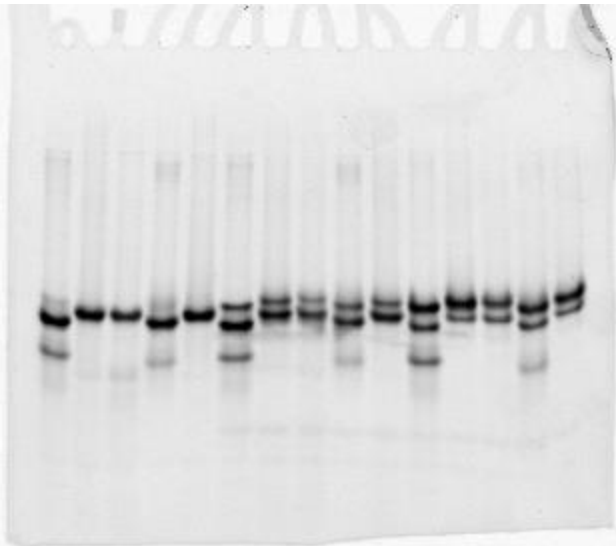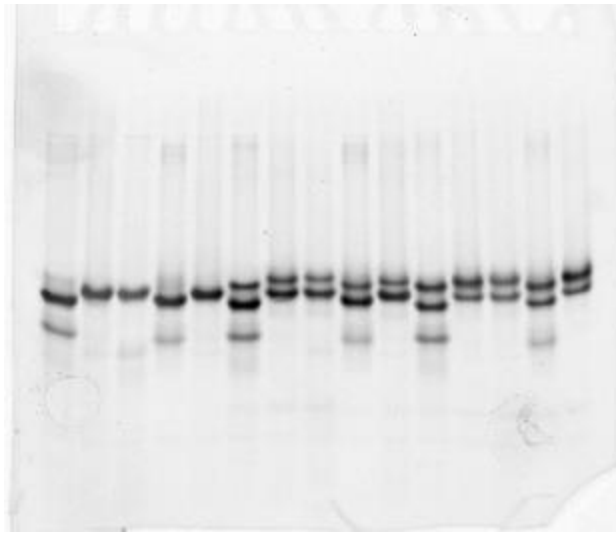

- From left to right:
- 1= dupDNA45
  - 2= 1D1L
  - 3= 2L2D
  - 4= 5midL
  - 5= 2D1L
  - 6= dupDNA45+TFO
  - 7= 1D1L+TFO
  - 8= 2L2D+TFO
  - 9= 5midL+TFO
  - 10= 2D1L+TFO
  - 11= dupDNA45+TFO+BQQ
  - 12= 1D1L+TFO+BQQ
  - 13= 2L2D+TFO+BQQ
  - 14= 5midL+TFO+BQQ
  - 15= 2D1L+TFO+BQQ

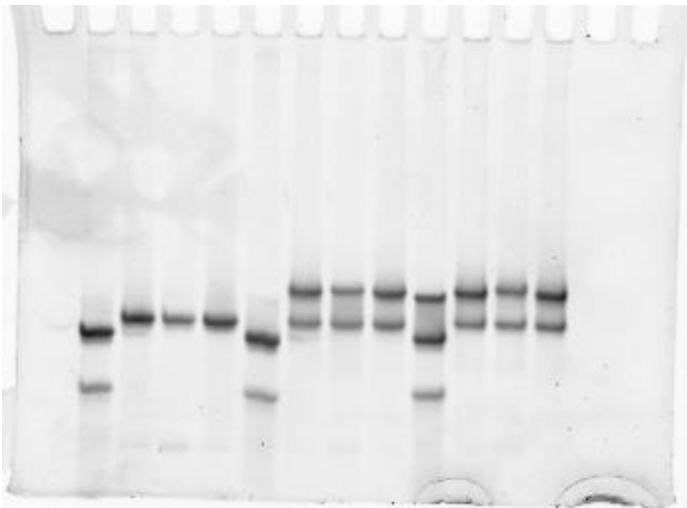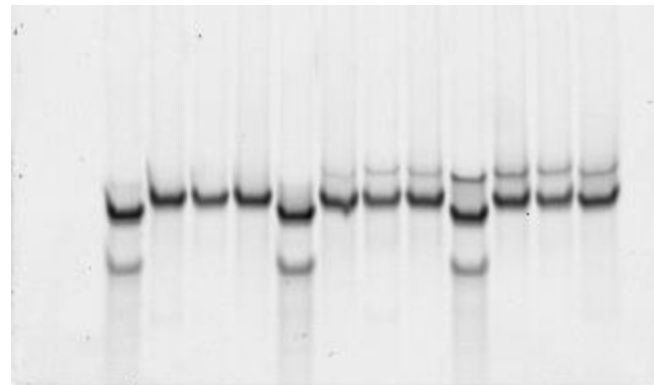

- From left to right:
- 1= dupDNA45
  - 2= 1D1L
  - 3= 2L2D
  - 4= 2D1L
  - 5= dupDNA45+TFO
  - 6= 1D1L+TFO
  - 7= 2L2D+TFO
  - 8= 2D1L+TFO
  - 9= dupDNA45+TFO+BQQ
  - 10= 1D1L+TFO+BQQ
  - 11= 2L2D+TFO+BQQ
  - 12= 2D1L+TFO+BQQ

## 2:1 ratio TFO:heteroduplex 1 h

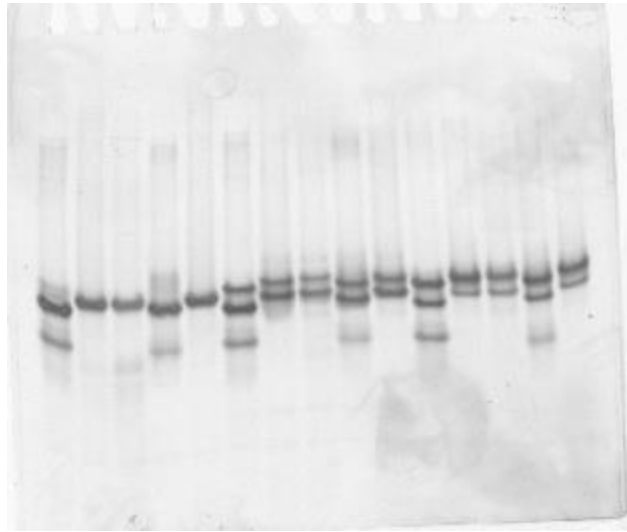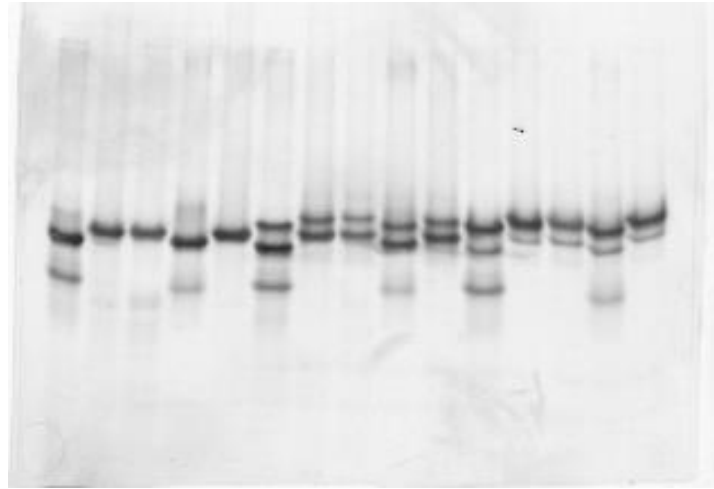

From left to right:  
1= dupDNA45  
2= 1D1L  
3= 2L2D  
4= 5midL  
5= 2D1L  
6= dupDNA45+TFO  
7= 1D1L+TFO  
8= 2L2D+TFO  
9= 5midL+TFO  
10= 2D1L+TFO  
11= dupDNA45+TFO+BQQ  
12= 1D1L+TFO+BQQ  
13= 2L2D+TFO+BQQ  
14= 5midL+TFO+BQQ  
15= 2D1L+TFO+BQQ

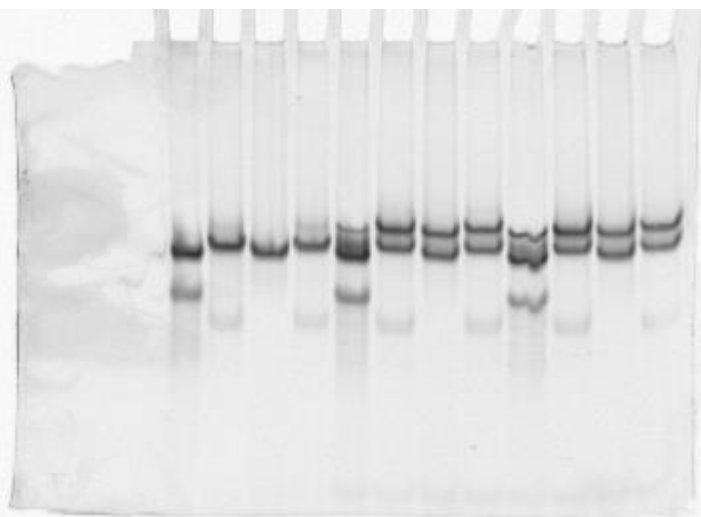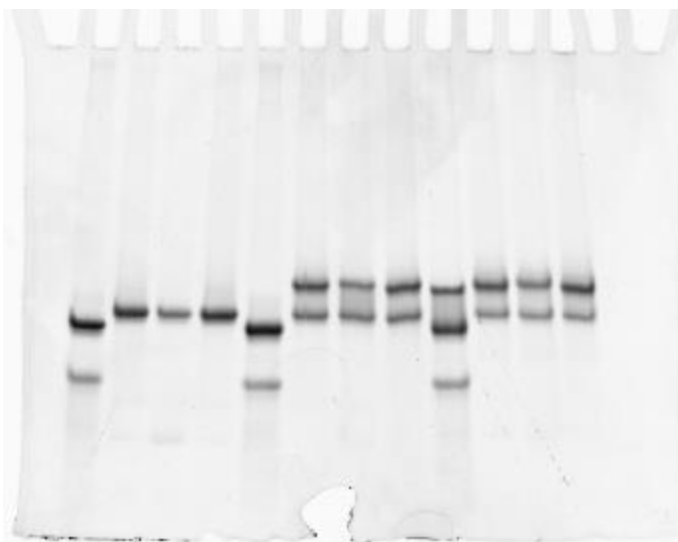

From left to right:  
1= dupDNA45  
2= 1D1L  
3= 2L2D  
4= 2D1L  
5= dupDNA45+TFO  
6= 1D1L+TFO  
7= 2L2D+TFO  
8= 2D1L+TFO  
9= dupDNA45+TFO+BQQ  
10= 1D1L+TFO+BQQ  
11= 2L2D+TFO+BQQ  
12= 2D1L+TFO+BQQ

## 2:1 ratio TFO:heteroduplex 24 h

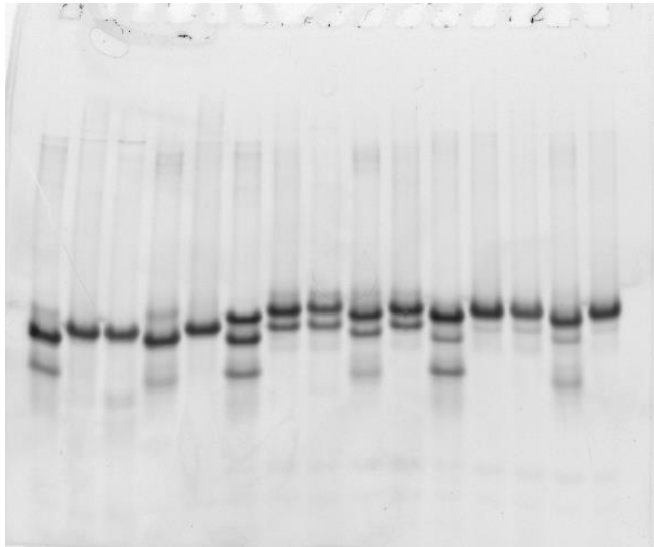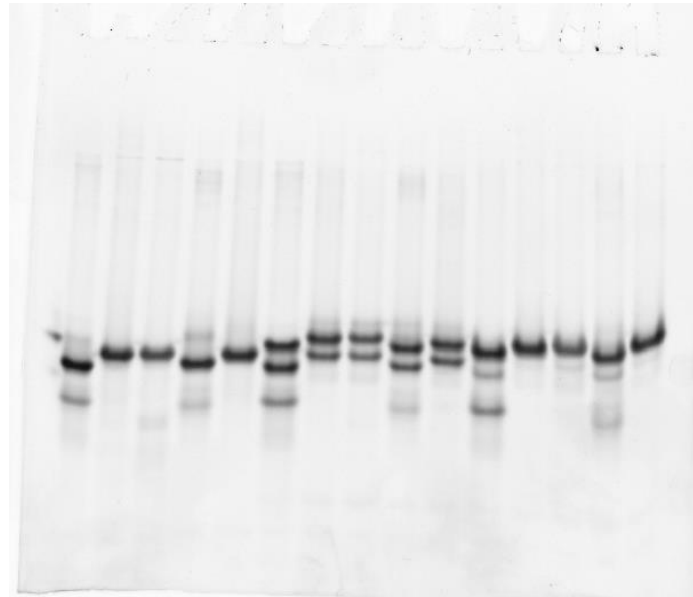

From left to right:  
1= dupDNA45  
2= 1D1L  
3= 2L2D  
4= 5midL  
5= 2D1L  
6= dupDNA45+TFO  
7= 1D1L+TFO  
8= 2L2D+TFO  
9= 5midL+TFO  
10= 2D1L+TFO  
11= dupDNA45+TFO+BQQ  
12= 1D1L+TFO+BQQ  
13= 2L2D+TFO+BQQ  
14= 5midL+TFO+BQQ  
15= 2D1L+TFO+BQQ

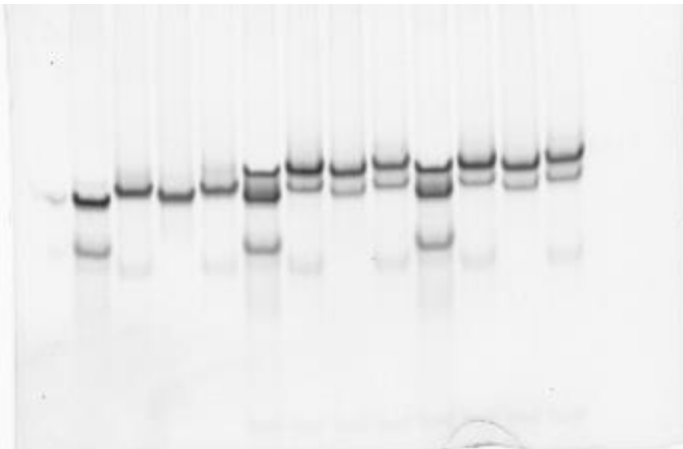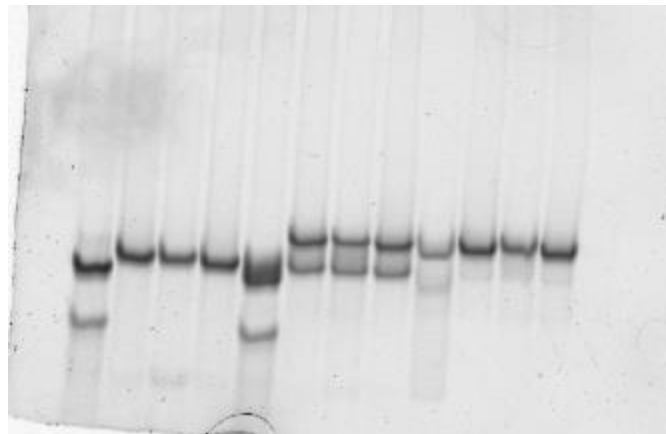

From left to right:  
1= dupDNA45  
2= 1D1L  
3= 2L2D  
4= 2D1L  
5= dupDNA45+TFO  
6= 1D1L+TFO  
7= 2L2D+TFO  
8= 2D1L+TFO  
9= dupDNA45+TFO+BQQ  
10= 1D1L+TFO+BQQ  
11= 2L2D+TFO+BQQ  
12= 2D1L+TFO+BQQ

**24:1 ratio TFO:heteroduplex**  
**0.5 h**

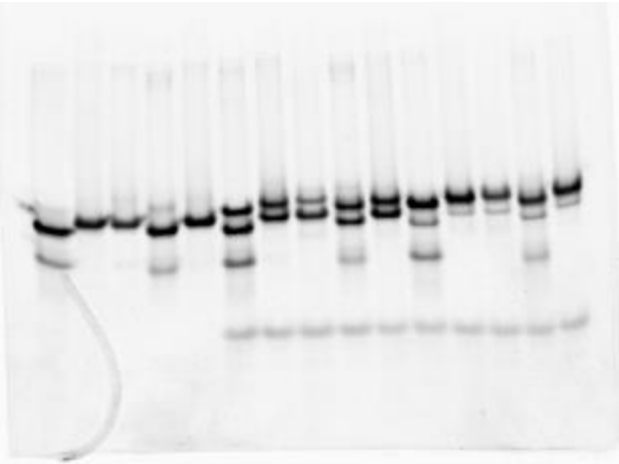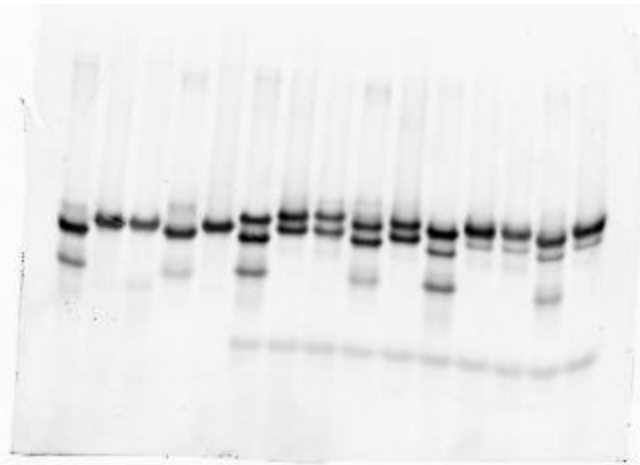

- From left to right:
- 1= dupDNA45
  - 2= 1D1L
  - 3= 2L2D
  - 4= 5midL
  - 5= 2D1L
  - 6= dupDNA45+TFO
  - 7= 1D1L+TFO
  - 8= 2L2D+TFO
  - 9= 5midL+TFO
  - 10= 2D1L+TFO
  - 11= dupDNA45+TFO+BQQ
  - 12= 1D1L+TFO+BQQ
  - 13= 2L2D+TFO+BQQ
  - 14= 5midL+TFO+BQQ
  - 15= 2D1L+TFO+BQQ

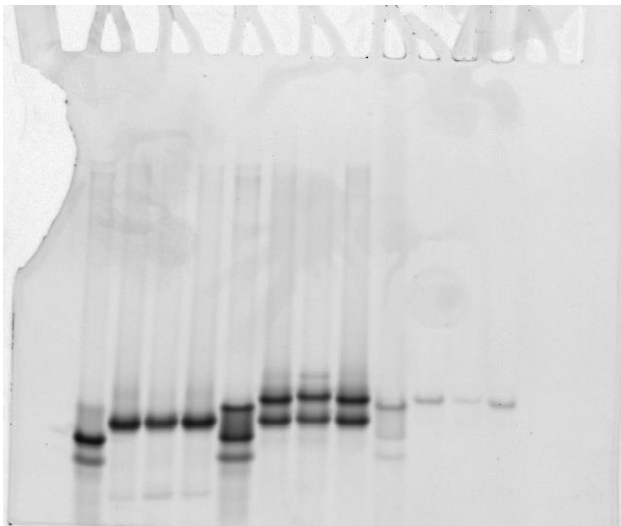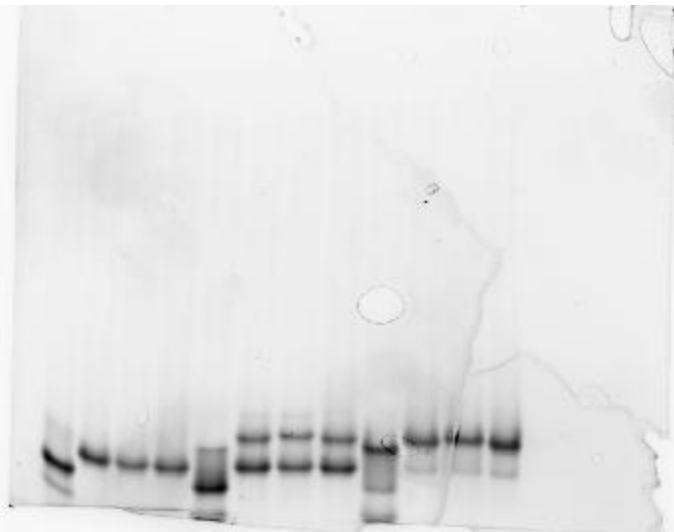

- From left to right:
- 1= dupDNA45
  - 2= 1D1L
  - 3= 2L2D
  - 4= 2D1L
  - 5= dupDNA45+TFO
  - 6= 1D1L+TFO
  - 7= 2L2D+TFO
  - 8= 2D1L+TFO
  - 9= dupDNA45+TFO+BQQ
  - 10= 1D1L+TFO+BQQ
  - 11= 2L2D+TFO+BQQ
  - 12= 2D1L+TFO+BQQ

# 24:1 ratio TFO:heteroduplex 1 h

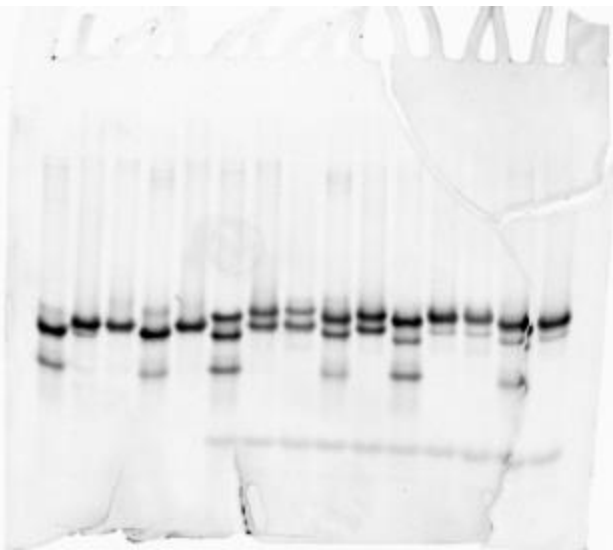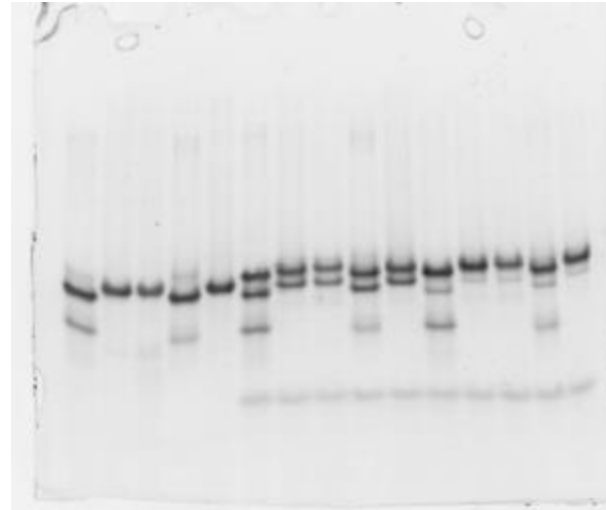

- From left to right:
- 1= dupDNA45
  - 2= 1D1L
  - 3= 2L2D
  - 4= 5midL
  - 5= 2D1L
  - 6= dupDNA45+TFO
  - 7= 1D1L+TFO
  - 8= 2L2D+TFO
  - 9= 5midL+TFO
  - 10= 2D1L+TFO
  - 11= dupDNA45+TFO+BQQ
  - 12= 1D1L+TFO+BQQ
  - 13= 2L2D+TFO+BQQ
  - 14= 5midL+TFO+BQQ
  - 15= 2D1L+TFO+BQQ

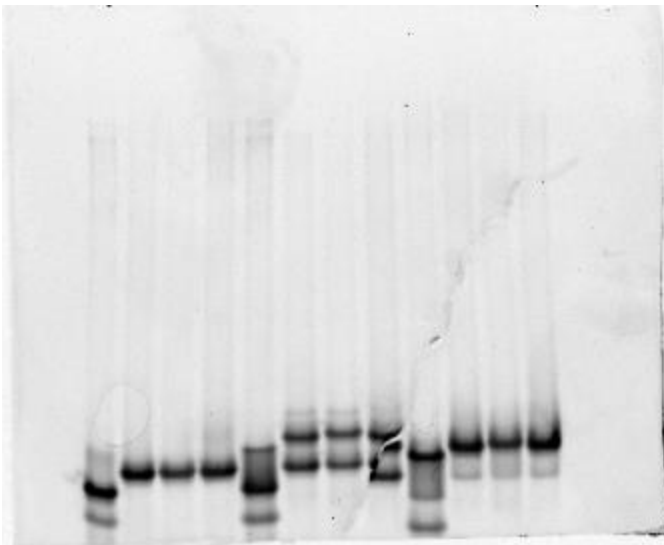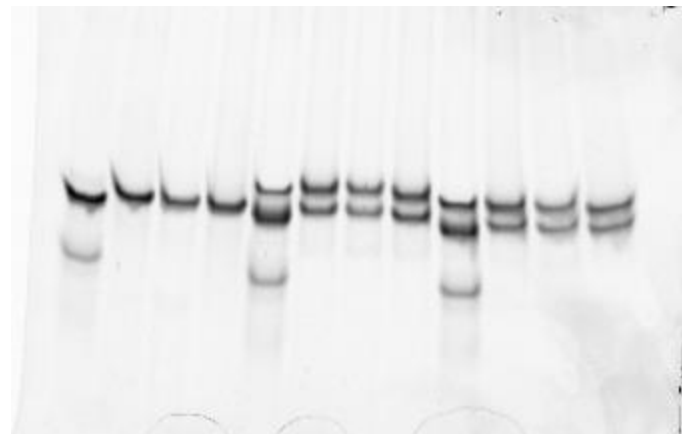

- From left to right:
- 1= dupDNA45
  - 2= 1D1L
  - 3= 2L2D
  - 4= 2D1L
  - 5= dupDNA45+TFO
  - 6= 1D1L+TFO
  - 7= 2L2D+TFO
  - 8= 2D1L+TFO
  - 9= dupDNA45+TFO+BQQ
  - 10= 1D1L+TFO+BQQ
  - 11= 2L2D+TFO+BQQ
  - 12= 2D1L+TFO+BQQ

**24:1 ratio TFO:heteroduplex**  
**24 h**

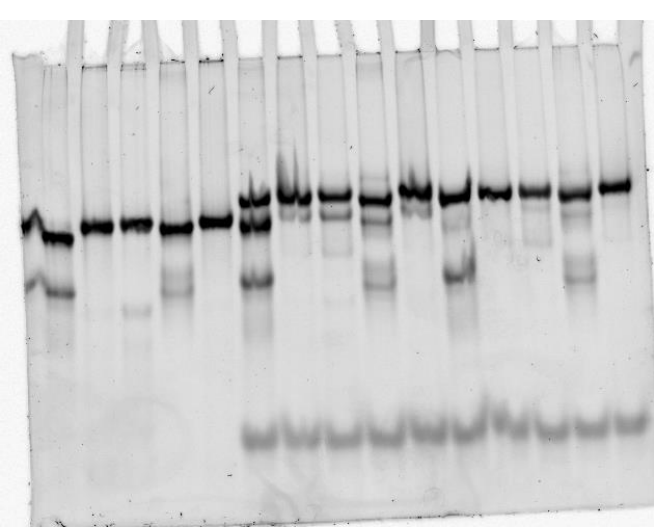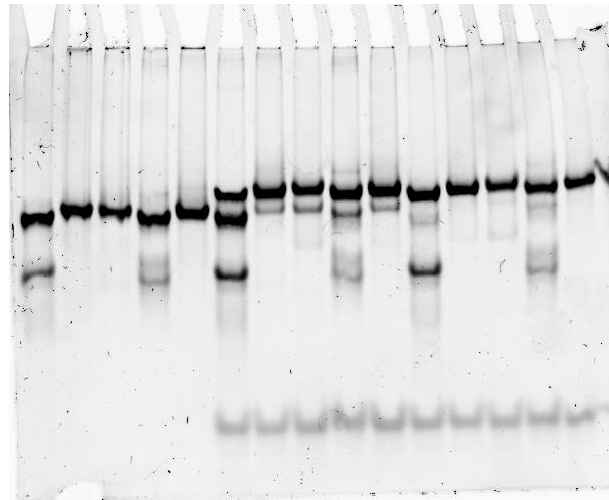

- From left to right:
- 1= dupDNA45
  - 2= 1D1L
  - 3= 2L2D
  - 4= 5midL
  - 5= 2D1L
  - 6= dupDNA45+TFO
  - 7= 1D1L+TFO
  - 8= 2L2D+TFO
  - 9= 5midL+TFO
  - 10= 2D1L+TFO
  - 11= dupDNA45+TFO+BQQ
  - 12= 1D1L+TFO+BQQ
  - 13= 2L2D+TFO+BQQ
  - 14= 5midL+TFO+BQQ
  - 15= 2D1L+TFO+BQQ

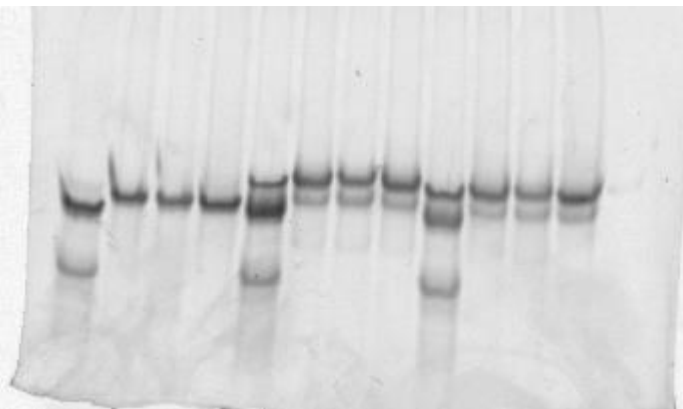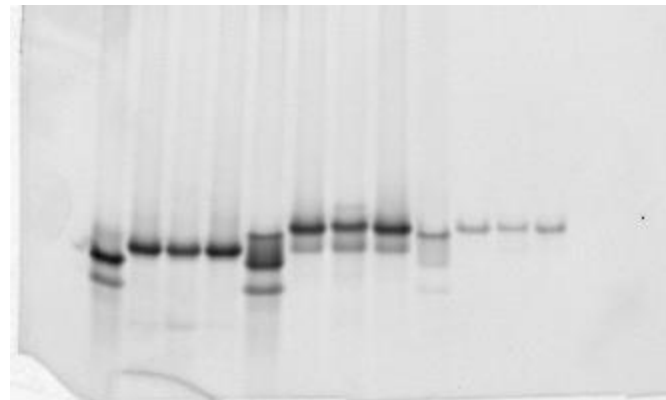

- From left to right:
- 1= dupDNA45
  - 2= 1D1L
  - 3= 2L2D
  - 4= 2D1L
  - 5= dupDNA45+TFO
  - 6= 1D1L+TFO
  - 7= 2L2D+TFO
  - 8= 2D1L+TFO
  - 9= dupDNA45+TFO+BQQ
  - 10= 1D1L+TFO+BQQ
  - 11= 2L2D+TFO+BQQ
  - 12= 2D1L+TFO+BQQ

## 5midL extra time points

### 2:1 ratio TFO:heteroduplex

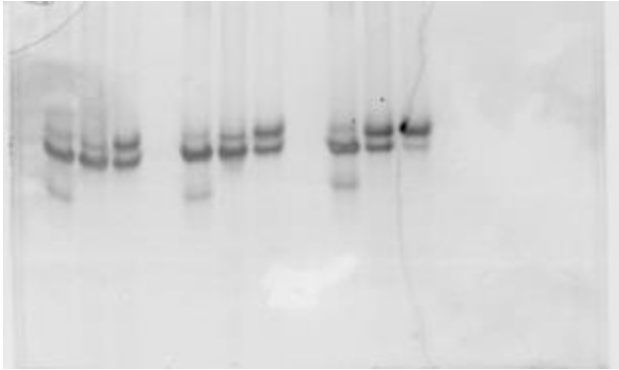

From left to right:

1= 5midL 0.5h

2= 5midL+TFO 0.5h

3= 5midL+TFO +BQQ 0.5h

4= 5midL 1h

5= 5midL+TFO 1h

6= 5midL+TFO+BQQ 1h

7= 5midL 24h

8= 5midL+TFO 24h

9= 5midL+TFO+BQQ 24h

### 24:1 ratio TFO:heteroduplex

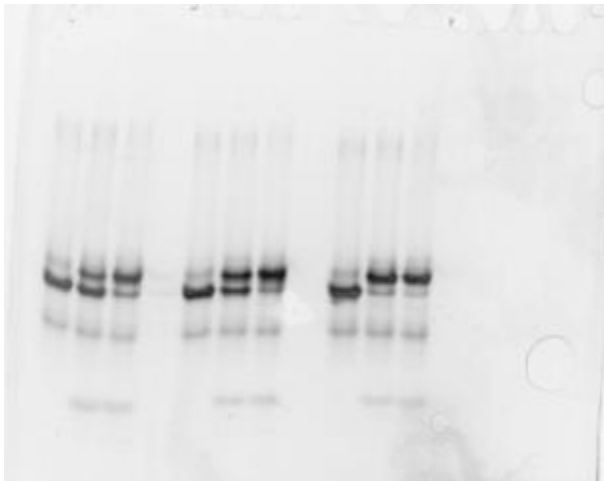

From left to right:

1= 5midL 0.5h

2= 5midL+TFO 0.5h

3= 5midL+TFO +BQQ 0.5h

4= 5midL 1h

5= 5midL+TFO 1h

6= 5midL+TFO+BQQ 1h

7= 5midL 24h

8= 5midL+TFO 24h

9= 5midL+TFO+BQQ 24h
